# Supplementary material for: Real-Time Prediction of Lane-Based Queue Lengths for Signalized Intersections
Source: Hindawi journal article supplement (doi:10.1155/2018/5020518), 2018-12-03
Supplement: f1 [file 5020518.f1.docx]

Table S1. Raw data of observation of the proportions of traffic volume

| Time interval | | Valume (vehs) | | | Proportions of traffic volume | | |
| --- | --- | --- | --- | --- | --- | --- | --- |
| Starting time | Stopping time | Lane 1 | Lane 2 | Lane 3 | Lane 1 | Lane 2 | Lane 3 |
| 15:25:00 | 15:29:59 | 13 | 41 | 37 | 0.143 | 0.451 | 0.407 |
| 15:30:00 | 15:34:59 | 5 | 36 | 42 | 0.060 | 0.434 | 0.506 |
| 15:35:00 | 15:39:59 | 13 | 38 | 35 | 0.151 | 0.442 | 0.407 |
| 15:40:00 | 15:44:59 | 13 | 29 | 32 | 0.176 | 0.392 | 0.432 |
| 15:45:00 | 15:49:59 | 14 | 37 | 33 | 0.167 | 0.440 | 0.393 |
| 15:50:00 | 15:54:59 | 9 | 33 | 27 | 0.130 | 0.478 | 0.391 |
| 15:55:00 | 15:59:59 | 11 | 38 | 27 | 0.145 | 0.500 | 0.355 |
| 16:00:00 | 16:04:59 | 13 | 39 | 38 | 0.144 | 0.433 | 0.422 |
| 16:05:00 | 16:09:59 | 14 | 38 | 35 | 0.161 | 0.437 | 0.402 |
| 16:10:00 | 16:14:59 | 10 | 43 | 35 | 0.114 | 0.489 | 0.398 |
| 16:15:00 | 16:19:59 | 17 | 45 | 37 | 0.172 | 0.455 | 0.374 |
| 16:20:00 | 16:24:59 | 11 | 39 | 31 | 0.136 | 0.481 | 0.383 |
| 16:25:00 | 16:29:59 | 10 | 31 | 27 | 0.147 | 0.456 | 0.397 |
| 16:30:00 | 16:34:59 | 9 | 37 | 36 | 0.110 | 0.451 | 0.439 |
| 16:35:00 | 16:39:59 | 15 | 38 | 40 | 0.161 | 0.409 | 0.430 |
| 16:40:00 | 16:44:59 | 15 | 39 | 39 | 0.161 | 0.419 | 0.419 |
| 16:45:00 | 16:49:59 | 17 | 33 | 34 | 0.202 | 0.393 | 0.405 |
| 16:50:00 | 16:54:59 | 11 | 36 | 36 | 0.133 | 0.434 | 0.434 |
| 16:55:00 | 16:59:59 | 15 | 41 | 34 | 0.167 | 0.456 | 0.378 |
| 17:00:00 | 17:04:59 | 16 | 24 | 29 | 0.232 | 0.348 | 0.420 |
| 17:05:00 | 17:09:59 | 12 | 31 | 27 | 0.171 | 0.443 | 0.386 |
| 17:10:00 | 17:14:59 | 12 | 30 | 31 | 0.164 | 0.411 | 0.425 |
| 17:15:00 | 17:19:59 | 18 | 38 | 35 | 0.198 | 0.418 | 0.385 |
| 17:20:00 | 17:24:59 | 13 | 35 | 39 | 0.149 | 0.402 | 0.448 |
| 17:25:00 | 17:29:59 | 14 | 35 | 43 | 0.152 | 0.380 | 0.467 |
| 17:30:00 | 17:34:59 | 18 | 24 | 24 | 0.273 | 0.364 | 0.364 |
| 17:35:00 | 17:39:59 | 12 | 58 | 55 | 0.096 | 0.464 | 0.440 |
| 17:40:00 | 17:44:59 | 10 | 22 | 26 | 0.172 | 0.379 | 0.448 |
| 17:45:00 | 17:49:59 | 17 | 48 | 44 | 0.156 | 0.440 | 0.404 |
| 17:50:00 | 17:54:59 | 21 | 38 | 37 | 0.219 | 0.396 | 0.385 |
| 17:55:00 | 17:59:59 | 9 | 26 | 22 | 0.158 | 0.456 | 0.386 |

Table S2. Raw data of prediction of the proportions of traffic volume (Kalman filter)

| Time interval | | Kalman filter | | | | | |
| --- | --- | --- | --- | --- | --- | --- | --- |
| All lanes (the proposed method) | | | Single lane (the previous method) | | |
| Starting time | Stopping time | Lane 1 | Lane 2 | Lane 3 | Lane 1 | Lane 2 | Lane 3 |
| 15:40:00 | 15:44:59 | 0.195 | 0.399 | 0.406 | 0.112 | 0.439 | 0.441 |
| 15:45:00 | 15:49:59 | 0.166 | 0.430 | 0.405 | 0.128 | 0.399 | 0.429 |
| 15:50:00 | 15:54:59 | 0.150 | 0.421 | 0.428 | 0.186 | 0.409 | 0.382 |
| 15:55:00 | 15:59:59 | 0.151 | 0.464 | 0.384 | 0.170 | 0.472 | 0.377 |
| 16:00:00 | 16:04:59 | 0.109 | 0.532 | 0.359 | 0.147 | 0.529 | 0.344 |
| 16:05:00 | 16:09:59 | 0.134 | 0.449 | 0.416 | 0.137 | 0.474 | 0.396 |
| 16:10:00 | 16:14:59 | 0.156 | 0.432 | 0.413 | 0.152 | 0.424 | 0.410 |
| 16:15:00 | 16:19:59 | 0.148 | 0.462 | 0.391 | 0.141 | 0.461 | 0.410 |
| 16:20:00 | 16:24:59 | 0.133 | 0.479 | 0.389 | 0.145 | 0.476 | 0.375 |
| 16:25:00 | 16:29:59 | 0.143 | 0.471 | 0.386 | 0.142 | 0.483 | 0.372 |
| 16:30:00 | 16:34:59 | 0.151 | 0.469 | 0.381 | 0.153 | 0.464 | 0.389 |
| 16:35:00 | 16:39:59 | 0.149 | 0.428 | 0.423 | 0.127 | 0.449 | 0.443 |
| 16:40:00 | 16:44:59 | 0.157 | 0.409 | 0.434 | 0.130 | 0.408 | 0.452 |
| 16:45:00 | 16:49:59 | 0.169 | 0.405 | 0.424 | 0.146 | 0.394 | 0.435 |
| 16:50:00 | 16:54:59 | 0.168 | 0.432 | 0.401 | 0.194 | 0.384 | 0.406 |
| 16:55:00 | 16:59:59 | 0.163 | 0.408 | 0.431 | 0.177 | 0.411 | 0.425 |
| 17:00:00 | 17:04:59 | 0.145 | 0.447 | 0.407 | 0.164 | 0.458 | 0.386 |
| 17:05:00 | 17:09:59 | 0.179 | 0.411 | 0.410 | 0.188 | 0.394 | 0.404 |
| 17:10:00 | 17:14:59 | 0.192 | 0.401 | 0.407 | 0.211 | 0.392 | 0.387 |
| 17:15:00 | 17:19:59 | 0.196 | 0.412 | 0.392 | 0.199 | 0.408 | 0.417 |
| 17:20:00 | 17:24:59 | 0.160 | 0.430 | 0.411 | 0.175 | 0.431 | 0.394 |
| 17:25:00 | 17:29:59 | 0.195 | 0.377 | 0.426 | 0.169 | 0.404 | 0.438 |
| 17:30:00 | 17:34:59 | 0.190 | 0.368 | 0.442 | 0.161 | 0.381 | 0.483 |
| 17:35:00 | 17:39:59 | 0.173 | 0.415 | 0.412 | 0.195 | 0.354 | 0.404 |
| 17:40:00 | 17:44:59 | 0.177 | 0.401 | 0.422 | 0.189 | 0.421 | 0.411 |
| 17:45:00 | 17:49:59 | 0.200 | 0.383 | 0.417 | 0.198 | 0.424 | 0.432 |
| 17:50:00 | 17:54:59 | 0.138 | 0.435 | 0.427 | 0.112 | 0.436 | 0.432 |
| 17:55:00 | 17:59:59 | 0.153 | 0.441 | 0.405 | 0.179 | 0.410 | 0.386 |

Table S3. Raw data of prediction of the proportions of traffic volume (traditional prediction methods)

| Time interval | | Traditional prediction methods | | | | | | | | |
| --- | --- | --- | --- | --- | --- | --- | --- | --- | --- | --- |
| Single exponential smoothing | | | Quadratic exponential smoothing | | | Third-order moving average | | |
| Starting time | Stopping time | Lane 1 | Lane 2 | Lane 3 | Lane 1 | Lane 2 | Lane 3 | Lane 1 | Lane 2 | Lane 3 |
| 15:40:00 | 15:44:59 | 0.161 | 0.403 | 0.428 | 0.161 | 0.403 | 0.428 | 0.118 | 0.442 | 0.440 |
| 15:45:00 | 15:49:59 | 0.164 | 0.427 | 0.401 | 0.164 | 0.427 | 0.401 | 0.129 | 0.422 | 0.448 |
| 15:50:00 | 15:54:59 | 0.140 | 0.460 | 0.391 | 0.140 | 0.460 | 0.391 | 0.165 | 0.425 | 0.411 |
| 15:55:00 | 15:59:59 | 0.143 | 0.486 | 0.364 | 0.143 | 0.486 | 0.364 | 0.158 | 0.437 | 0.406 |
| 16:00:00 | 16:04:59 | 0.143 | 0.447 | 0.402 | 0.143 | 0.447 | 0.402 | 0.147 | 0.473 | 0.380 |
| 16:05:00 | 16:09:59 | 0.155 | 0.437 | 0.400 | 0.155 | 0.437 | 0.400 | 0.140 | 0.471 | 0.390 |
| 16:10:00 | 16:14:59 | 0.125 | 0.471 | 0.396 | 0.125 | 0.471 | 0.396 | 0.150 | 0.457 | 0.393 |
| 16:15:00 | 16:19:59 | 0.157 | 0.457 | 0.378 | 0.157 | 0.457 | 0.378 | 0.140 | 0.453 | 0.407 |
| 16:20:00 | 16:24:59 | 0.141 | 0.472 | 0.379 | 0.141 | 0.472 | 0.379 | 0.149 | 0.460 | 0.391 |
| 16:25:00 | 16:29:59 | 0.144 | 0.458 | 0.389 | 0.144 | 0.458 | 0.389 | 0.140 | 0.475 | 0.385 |
| 16:30:00 | 16:34:59 | 0.120 | 0.451 | 0.422 | 0.120 | 0.451 | 0.422 | 0.152 | 0.464 | 0.385 |
| 16:35:00 | 16:39:59 | 0.148 | 0.419 | 0.426 | 0.148 | 0.419 | 0.426 | 0.131 | 0.463 | 0.406 |
| 16:40:00 | 16:44:59 | 0.156 | 0.416 | 0.419 | 0.156 | 0.416 | 0.419 | 0.139 | 0.439 | 0.422 |
| 16:45:00 | 16:49:59 | 0.188 | 0.397 | 0.407 | 0.188 | 0.397 | 0.407 | 0.144 | 0.426 | 0.429 |
| 16:50:00 | 16:54:59 | 0.148 | 0.420 | 0.423 | 0.148 | 0.420 | 0.423 | 0.175 | 0.407 | 0.418 |
| 16:55:00 | 16:59:59 | 0.160 | 0.443 | 0.389 | 0.160 | 0.443 | 0.389 | 0.165 | 0.415 | 0.419 |
| 17:00:00 | 17:04:59 | 0.209 | 0.374 | 0.409 | 0.209 | 0.374 | 0.409 | 0.167 | 0.427 | 0.405 |
| 17:05:00 | 17:09:59 | 0.182 | 0.420 | 0.390 | 0.182 | 0.420 | 0.390 | 0.177 | 0.412 | 0.411 |
| 17:10:00 | 17:14:59 | 0.169 | 0.411 | 0.412 | 0.169 | 0.411 | 0.412 | 0.190 | 0.415 | 0.395 |
| 17:15:00 | 17:19:59 | 0.188 | 0.413 | 0.391 | 0.188 | 0.413 | 0.391 | 0.189 | 0.401 | 0.410 |
| 17:20:00 | 17:24:59 | 0.160 | 0.404 | 0.429 | 0.160 | 0.404 | 0.429 | 0.178 | 0.424 | 0.398 |
| 17:25:00 | 17:29:59 | 0.153 | 0.385 | 0.454 | 0.153 | 0.385 | 0.454 | 0.171 | 0.410 | 0.419 |
| 17:30:00 | 17:34:59 | 0.236 | 0.368 | 0.388 | 0.236 | 0.368 | 0.388 | 0.166 | 0.400 | 0.433 |
| 17:35:00 | 17:39:59 | 0.137 | 0.433 | 0.422 | 0.137 | 0.433 | 0.422 | 0.191 | 0.382 | 0.426 |
| 17:40:00 | 17:44:59 | 0.161 | 0.393 | 0.438 | 0.161 | 0.393 | 0.438 | 0.174 | 0.403 | 0.424 |
| 17:45:00 | 17:49:59 | 0.157 | 0.424 | 0.411 | 0.157 | 0.424 | 0.411 | 0.180 | 0.402 | 0.417 |
| 17:50:00 | 17:54:59 | 0.199 | 0.402 | 0.391 | 0.199 | 0.402 | 0.391 | 0.141 | 0.428 | 0.431 |
| 17:55:00 | 17:59:59 | 0.170 | 0.437 | 0.385 | 0.170 | 0.437 | 0.385 | 0.182 | 0.405 | 0.412 |

Table S4. Raw data of Figure 8 (Maximum queue length comparison)

| Lane 1 | | | Lane 2 | | | Lane 3 | | |
| --- | --- | --- | --- | --- | --- | --- | --- | --- |
| Time | Observation (vehs) | Prediction(vehs) | Time | Observation (vehs) | Prediction(vehs) | Time | Observation (vehs) | Prediction(vehs) |
| 15:46:52 | 8 | 7.724047 | 15:47:12 | 21 | 20.51694 | 15:47:07 | 17 | 17.30673 |
| 15:49:32 | 4 | 4.497659 | 15:49:42 | 10 | 7.961441 | 15:49:32 | 7 | 6.486095 |
| 15:52:12 | 6 | 3.419423 | 15:52:27 | 9 | 5.380725 | 15:52:27 | 8 | 4.427413 |
| 15:54:52 | 6 | 2.859784 | 15:54:57 | 8 | 4.221021 | 15:54:57 | 7 | 1.929722 |
| 15:57:37 | 6 | 4.038274 | 15:57:47 | 11 | 8.340476 | 15:57:47 | 8 | 7.209343 |
| 16:00:12 | 5 | 2.741542 | 16:00:27 | 12 | 9.279487 | 16:00:17 | 8 | 5.33663 |
| 16:02:52 | 6 | 3.868488 | 16:03:17 | 17 | 16.78662 | 16:03:17 | 16 | 12.98337 |
| 16:05:42 | 8 | 3.689503 | 16:05:52 | 14 | 13.29117 | 16:05:52 | 12 | 10.99096 |
| 16:08:17 | 7 | 2.684639 | 16:08:32 | 14 | 12.60036 | 16:08:32 | 13 | 10.61235 |
| 16:10:57 | 7 | 3.8095 | 16:11:17 | 22 | 22.66322 | 16:11:17 | 17 | 17.7789 |
| 16:13:32 | 5 | 3.301884 | 16:13:57 | 20 | 19.77326 | 16:13:47 | 14 | 10.80579 |
| 16:16:12 | 5 | 3.787292 | 16:16:37 | 21 | 20.58747 | 16:16:37 | 19 | 15.50708 |
| 16:18:57 | 4 | 4.239761 | 16:19:07 | 18 | 17.36832 | 16:19:02 | 13 | 11.27283 |
| 16:21:32 | 4 | 3.727066 | 16:21:57 | 19 | 20.01601 | 16:21:52 | 12 | 11.91332 |
| 16:24:07 | 4 | 2.837614 | 16:24:22 | 14 | 13.26965 | 16:24:22 | 9 | 8.051014 |
| 16:26:52 | 5 | 4.723889 | 16:27:02 | 19 | 21.56514 | 16:27:02 | 13 | 12.80462 |
| 16:29:32 | 6 | 5.777305 | 16:29:57 | 22 | 23.72361 | 16:29:57 | 16 | 14.11653 |
| 16:32:12 | 5 | 4.832207 | 16:32:32 | 22 | 19.12677 | 16:32:27 | 18 | 17.8108 |
| 16:34:57 | 8 | 5.568669 | 16:35:37 | 27 | 22.79451 | 16:35:17 | 16 | 14.30418 |
| 16:37:37 | 12 | 9.731143 | 16:37:42 | 23 | 23.44017 | 16:37:42 | 16 | 14.73463 |
| 16:40:17 | 9 | 9.540972 | 16:40:27 | 15 | 11.35408 | 16:40:27 | 9 | 7.586087 |
| 16:42:52 | 5 | 6.350259 | 16:43:12 | 17 | 14.95867 | 16:43:07 | 11 | 10.39828 |
| 16:45:32 | 6 | 4.358069 | 16:45:42 | 14 | 14.53521 | 16:45:27 | 8 | 9.834559 |
| 16:48:12 | 8 | 5.343708 | 16:48:17 | 12 | 11.53317 | 16:48:17 | 11 | 7.999695 |
| 16:50:52 | 5 | 5.131446 | 16:51:02 | 14 | 13.41237 | 16:51:02 | 14 | 9.18388 |
| 16:53:37 | 6 | 4.431898 | 16:53:57 | 17 | 16.7012 | 16:53:57 | 15 | 12.54373 |
| 16:56:22 | 9 | 7.796201 | 16:56:27 | 13 | 12.77648 | 16:56:12 | 8 | 9.16076 |
| 16:58:57 | 6 | 6.038536 | 16:59:27 | 19 | 18.74398 | 16:59:27 | 17 | 13.21882 |
| 17:01:32 | 9 | 4.667095 | 17:01:47 | 19 | 16.47708 | 17:01:47 | 18 | 13.01937 |
| 17:04:32 | 12 | 8.071949 | 17:04:32 | 12 | 10.82055 | 17:04:12 | 5 | 4.803329 |
| 17:07:12 | 14 | 15.34058 | 17:07:17 | 20 | 21.26111 | 17:07:17 | 16 | 14.11266 |
| 17:09:37 | 10 | 10.07512 | 17:09:47 | 15 | 15.98069 | 17:09:47 | 13 | 10.65521 |
| 17:12:17 | 8 | 5.998427 | 17:12:27 | 15 | 11.98104 | 17:12:27 | 12 | 9.331053 |
| 17:14:57 | 10 | 10.75238 | 17:15:17 | 16 | 15.88806 | 17:15:17 | 14 | 9.690341 |
| 17:17:32 | 6 | 5.18969 | 17:17:52 | 17 | 15.23075 | 17:17:47 | 14 | 9.70669 |
| 17:20:12 | 6 | 5.542185 | 17:20:22 | 14 | 13.78112 | 17:20:22 | 11 | 9.504457 |
| 17:22:57 | 7 | 5.58923 | 17:23:07 | 17 | 16.50723 | 17:23:07 | 14 | 10.01787 |
| 17:25:37 | 8 | 6.055602 | 17:25:42 | 13 | 16.21403 | 17:25:42 | 12 | 9.951442 |
| 17:28:07 | 8 | 8.355126 | 17:28:42 | 26 | 22.67723 | 17:28:42 | 26 | 18.1374 |
| 17:30:57 | 7 | 5.477832 | 17:31:02 | 11 | 9.826664 | 17:30:57 | 8 | 7.229437 |
| 17:34:42 | 8 | 7.447828 | 17:35:02 | 25 | 25.87583 | 17:35:02 | 23 | 20.72895 |
| 17:38:32 | 8 | 8.482821 | 17:39:12 | 25 | 23.90981 | 17:39:12 | 25 | 24.47391 |
| 17:42:17 | 10 | 10.05463 | 17:42:42 | 27 | 21.01124 | 17:42:42 | 25 | 23.74852 |
| 17:45:22 | 7 | 5.441747 | 17:45:47 | 23 | 16.25697 | 17:45:42 | 20 | 18.70601 |
| 17:48:27 | 12 | 10.30766 | 17:48:37 | 22 | 17.44729 | 17:48:37 | 21 | 21.93192 |
| 17:51:22 | 10 | 8.930247 | 17:51:37 | 19 | 14.88978 | 17:51:37 | 20 | 18.33767 |
| 17:54:27 | 11 | 8.34314 | 17:54:27 | 19 | 17.45356 | 17:54:27 | 17 | 18.5597 |
| 17:57:22 | 10 | 7.799376 | 17:57:32 | 19 | 16.44264 | 17:57:32 | 16 | 17.70955 |

Table S5. Raw data of Figure 9 (Queue trajectory)

| Time | Queue trajectory (vehs) | | |
| --- | --- | --- | --- |
| Lane 1 | Lane 2 | Lane 3 |
| 17:23:17 | 0 | 0 | 0 |
| 17:23:22 | 0.162477 | 0 | 0 |
| 17:23:27 | 0.324955 | 0 | 0 |
| 17:23:32 | 0.487432 | 0 | 0 |
| 17:23:37 | 0.649909 | 0 | 0 |
| 17:23:42 | 0.812387 | 0 | 0 |
| 17:23:47 | 0.812387 | 0 | 0 |
| 17:23:52 | 0.812387 | 0 | 0 |
| 17:23:57 | 0.812387 | 0 | 0 |
| 17:24:02 | 0.812387 | 0 | 0 |
| 17:24:07 | 0.977225 | 0.254451 | 0.16573 |
| 17:24:12 | 1.223397 | 0.717158 | 0.463622 |
| 17:24:17 | 1.512066 | 1.347495 | 0.865718 |
| 17:24:22 | 2.092593 | 2.621907 | 1.648594 |
| 17:24:27 | 2.63846 | 4.057384 | 2.525774 |
| 17:24:32 | 3.169189 | 5.629385 | 3.479608 |
| 17:24:37 | 3.692208 | 7.308077 | 4.492675 |
| 17:24:42 | 4.211291 | 9.069476 | 5.551287 |
| 17:24:47 | 4.728364 | 10.89458 | 6.644787 |
| 17:24:52 | 5.062095 | 12.32252 | 7.529511 |
| 17:24:57 | 5.062095 | 12.32252 | 7.529511 |
| 17:25:02 | 5.062095 | 12.32252 | 7.529511 |
| 17:25:07 | 5.062095 | 12.32252 | 7.529511 |
| 17:25:12 | 5.062095 | 12.32252 | 7.529511 |
| 17:25:17 | 5.224572 | 12.87536 | 7.88408 |
| 17:25:22 | 5.224572 | 12.87536 | 7.88408 |
| 17:25:27 | 5.412641 | 13.44117 | 8.237049 |
| 17:25:32 | 5.671017 | 14.15399 | 8.682352 |
| 17:25:37 | 6.055602 | 15.17835 | 9.30747 |
| 17:25:42 | 0 | 16.21403 | 9.951442 |
| 17:25:47 | 0 | 4.309273 | 1.177978 |
| 17:25:52 | 0 | 0 | 0 |
| 17:25:57 | 0 | 0 | 0 |
| 17:26:02 | 0 | 0 | 0 |
| 17:26:07 | 0.162477 | 0 | 0 |
| 17:26:12 | 0.162477 | 0 | 0 |
| 17:26:17 | 0.162477 | 0 | 0 |
| 17:26:22 | 0.345659 | 0 | 0 |
| 17:26:27 | 0.345659 | 0 | 0 |
| 17:26:32 | 0.345659 | 0 | 2 |
| 17:26:37 | 0.528842 | 0.518558 | 2.365087 |
| 17:26:42 | 0.528842 | 0.518558 | 2.365087 |
| 17:26:47 | 0.528842 | 0.518558 | 2.365087 |
| 17:26:52 | 0.528842 | 0.518558 | 2.365087 |
| 17:26:57 | 0.528842 | 0.518558 | 2.365087 |
| 17:27:02 | 0.528842 | 0.518558 | 2.365087 |
| 17:27:07 | 0.803677 | 0.911598 | 3.609935 |
| 17:27:12 | 1.432717 | 1.914896 | 4.299001 |
| 17:27:17 | 2.257584 | 3.463406 | 5.337279 |
| 17:27:22 | 3.071383 | 5.276045 | 6.540521 |
| 17:27:27 | 3.881157 | 7.307862 | 7.8767 |
| 17:27:32 | 4.576248 | 9.286223 | 9.18459 |
| 17:27:37 | 5.443524 | 11.71587 | 10.74926 |
| 17:27:42 | 6.051097 | 13.71008 | 12.07649 |
| 17:27:47 | 6.440483 | 15.25739 | 13.13329 |
| 17:27:52 | 6.932601 | 16.94494 | 14.25945 |
| 17:27:57 | 7.692866 | 19.17008 | 15.69084 |
| 17:28:02 | 8.355126 | 21.21572 | 17.04214 |
| 17:28:07 | 8.355126 | 21.21572 | 17.04214 |
| 17:28:12 | 0.37982 | 21.21572 | 17.04214 |
| 17:28:17 | 0 | 21.21572 | 17.04214 |
| 17:28:22 | 0 | 21.21572 | 17.04214 |
| 17:28:27 | 0 | 21.21572 | 17.04214 |
| 17:28:32 | 0 | 21.73427 | 17.40723 |
| 17:28:37 | 0.183182 | 22.1993 | 17.77232 |
| 17:28:42 | 0.366364 | 22.67723 | 18.1374 |
| 17:28:47 | 0.549546 | 7.54087 | 5.270958 |
| 17:28:52 | 0.732728 | 0 | 0 |
| 17:28:57 | 1.110481 | 0 | 0 |
| 17:29:02 | 1.110481 | 0 | 0 |
| 17:29:07 | 1.362491 | 0 | 0 |
| 17:29:12 | 1.675249 | 0.239306 | 0.170505 |
| 17:29:17 | 2.119035 | 0.809526 | 0.570495 |
| 17:29:22 | 2.529151 | 1.506827 | 1.057134 |
| 17:29:27 | 3.025029 | 2.459023 | 1.713465 |
| 17:29:32 | 3.460813 | 3.450798 | 2.396888 |
| 17:29:37 | 3.970779 | 4.644636 | 3.21079 |
| 17:29:42 | 3.970779 | 4.644636 | 3.21079 |
| 17:29:47 | 3.970779 | 4.644636 | 3.21079 |
| 17:29:52 | 3.970779 | 4.644636 | 3.21079 |
| 17:29:57 | 4.348531 | 5.778518 | 3.987639 |
| 17:30:02 | 4.531713 | 6.297076 | 4.352725 |
| 17:30:07 | 4.531713 | 6.297076 | 4.352725 |
| 17:30:12 | 4.531713 | 6.297076 | 4.352725 |
| 17:30:17 | 4.714895 | 6.815634 | 4.717812 |
| 17:30:22 | 4.898077 | 7.334192 | 5.082899 |
| 17:30:27 | 4.898077 | 7.334192 | 5.082899 |
| 17:30:32 | 4.898077 | 7.334192 | 5.082899 |
| 17:30:37 | 4.898077 | 7.334192 | 5.082899 |
| 17:30:42 | 5.081259 | 7.85275 | 5.447986 |
| 17:30:47 | 5.081259 | 7.85275 | 5.447986 |
| 17:30:52 | 5.081259 | 7.85275 | 5.447986 |
| 17:30:57 | 5.477832 | 8.538797 | 7.229437 |
| 17:31:02 | 0 | 9.826664 | 0 |
| 17:31:07 | 0 | 1.115589 | 0 |
| 17:31:12 | 0 | 0 | 0 |
| 17:31:17 | 0 | 0 | 0 |
| 17:31:22 | 0 | 0 | 0 |
| 17:31:27 | 0.41393 | 0 | 0 |
| 17:31:32 | 0.759316 | 0 | 0 |
| 17:31:37 | 1.293763 | 0 | 0 |
| 17:31:42 | 1.772793 | 0 | 0 |
| 17:31:47 | 2.07777 | 0 | 0 |
| 17:31:52 | 2.07777 | 0 | 0 |
| 17:31:57 | 2.07777 | 0 | 0 |
| 17:32:02 | 2.07777 | 0 | 0 |
| 17:32:07 | 2.07777 | 0 | 0 |
| 17:32:12 | 2.07777 | 0 | 0 |
| 17:32:17 | 2.07777 | 0 | 0 |
| 17:32:22 | 2.354342 | 1.119309 | 0.908415 |
| 17:32:27 | 2.489551 | 1.631765 | 1.331033 |
| 17:32:32 | 2.489551 | 1.631765 | 1.331033 |
| 17:32:37 | 2.62476 | 2.14422 | 1.75365 |
| 17:32:42 | 2.759969 | 2.656676 | 2.176267 |
| 17:32:47 | 2.759969 | 2.656676 | 2.176267 |
| 17:32:52 | 2.895178 | 3.169132 | 2.598885 |
| 17:32:57 | 3.079839 | 3.666611 | 3.008697 |
| 17:33:02 | 3.308999 | 4.304466 | 3.532359 |
| 17:33:07 | 3.633669 | 5.205403 | 4.266234 |
| 17:33:12 | 4.159603 | 6.667725 | 5.437834 |
| 17:33:17 | 4.480659 | 7.839279 | 6.389718 |
| 17:33:22 | 5.010202 | 9.575986 | 7.769737 |
| 17:33:27 | 5.145411 | 10.08844 | 8.192354 |
| 17:33:32 | 5.145411 | 10.08844 | 8.192354 |
| 17:33:37 | 5.28062 | 10.6009 | 8.614971 |
| 17:33:42 | 5.28062 | 10.6009 | 8.614971 |
| 17:33:47 | 5.28062 | 10.6009 | 8.614971 |
| 17:33:52 | 5.415829 | 11.11335 | 9.037588 |
| 17:33:57 | 5.415829 | 11.11335 | 9.037588 |
| 17:34:02 | 5.551038 | 11.62581 | 9.460206 |
| 17:34:07 | 5.686247 | 12.13826 | 9.882823 |
| 17:34:12 | 5.821456 | 12.65072 | 10.30544 |
| 17:34:17 | 5.821456 | 12.65072 | 10.30544 |
| 17:34:22 | 5.821456 | 12.65072 | 10.30544 |
| 17:34:27 | 5.821456 | 12.65072 | 10.30544 |
| 17:34:32 | 6.187093 | 13.57457 | 11.03788 |
| 17:34:37 | 6.896427 | 15.49716 | 12.52999 |
| 17:34:42 | 7.447828 | 17.24437 | 13.92374 |
| 17:34:47 | 0 | 19.26289 | 15.51415 |
| 17:34:52 | 0 | 22.03702 | 17.63706 |
| 17:34:57 | 0 | 24.08267 | 19.28056 |
| 17:35:02 | 0 | 25.87583 | 20.72895 |
| 17:35:07 | 0 | 9.14017 | 6.566734 |
| 17:35:12 | 0.065135 | 0.772342 | 0 |
| 17:35:17 | 0.065135 | 0 | 0 |
| 17:35:22 | 0.065135 | 0 | 0 |
| 17:35:27 | 0.065135 | 0 | 0 |
| 17:35:32 | 0.065135 | 0 | 0 |
| 17:35:37 | 0.065135 | 0 | 0 |
| 17:35:42 | 0.065135 | 0 | 0 |
| 17:35:47 | 0.200344 | 0 | 0 |
| 17:35:52 | 0.335553 | 0 | 0 |
| 17:35:57 | 0.470762 | 0.512456 | 0.422617 |
| 17:36:02 | 0.605971 | 1.024911 | 0.845235 |
| 17:36:07 | 0.804614 | 1.430627 | 1.180578 |
| 17:36:12 | 1.068097 | 1.961003 | 1.664832 |
| 17:36:17 | 1.451635 | 2.71516 | 2.39621 |
| 17:36:22 | 1.723619 | 3.386596 | 3.055936 |
| 17:36:27 | 1.941447 | 4.001339 | 3.66673 |
| 17:36:32 | 2.215842 | 4.699577 | 4.371621 |
| 17:36:37 | 2.433733 | 5.329501 | 5.011377 |
| 17:36:42 | 2.624212 | 5.913255 | 5.607233 |
| 17:36:47 | 2.786147 | 6.35634 | 6.069166 |
| 17:36:52 | 2.948083 | 6.799425 | 6.531098 |
| 17:36:57 | 2.948083 | 6.799425 | 6.531098 |
| 17:37:02 | 2.948083 | 6.799425 | 6.531098 |
| 17:37:07 | 2.948083 | 6.799425 | 6.531098 |
| 17:37:12 | 2.948083 | 6.799425 | 6.531098 |
| 17:37:17 | 3.110018 | 7.24251 | 6.99303 |
| 17:37:22 | 3.110018 | 7.24251 | 6.99303 |
| 17:37:27 | 3.211472 | 7.483601 | 7.24297 |
| 17:37:32 | 3.689282 | 8.286075 | 8.080175 |
| 17:37:37 | 4.273519 | 9.383357 | 9.228208 |
| 17:37:42 | 4.820208 | 10.57283 | 10.47382 |
| 17:37:47 | 5.445953 | 12.01723 | 11.98942 |
| 17:37:52 | 6.01281 | 13.46846 | 13.51212 |
| 17:37:57 | 6.649867 | 15.1294 | 15.25796 |
| 17:38:02 | 7.221625 | 16.73709 | 16.94658 |
| 17:38:07 | 7.962518 | 18.73862 | 19.05675 |
| 17:38:12 | 8.482821 | 20.34887 | 20.74623 |
| 17:38:17 | 8.482821 | 20.34887 | 20.74623 |
| 17:38:22 | 8.482821 | 20.34887 | 20.74623 |
| 17:38:27 | 8.482821 | 20.34887 | 20.74623 |
| 17:38:32 | 8.482821 | 20.34887 | 20.74623 |
| 17:38:37 | 0.443668 | 20.34887 | 20.74623 |
| 17:38:42 | 0 | 20.79195 | 21.20816 |
| 17:38:47 | 0 | 20.79195 | 21.20816 |
| 17:38:52 | 0 | 21.23504 | 21.6701 |
| 17:38:57 | 0.161935 | 21.67812 | 22.13203 |
| 17:39:02 | 0.32387 | 22.12121 | 22.59396 |
| 17:39:07 | 0.629112 | 22.82997 | 23.33789 |
| 17:39:12 | 1.123452 | 23.90981 | 24.47391 |
| 17:39:17 | 1.626396 | 8.157163 | 8.439214 |
| 17:39:22 | 2.227047 | 0.280838 | 0.421864 |
| 17:39:27 | 2.227047 | 0 | 0 |
| 17:39:32 | 2.227047 | 0 | 0 |
| 17:39:37 | 2.227047 | 0 | 0 |
| 17:39:42 | 2.559785 | 0.955871 | 0.999876 |
| 17:39:47 | 2.72172 | 1.398956 | 1.461808 |
| 17:39:52 | 2.72172 | 1.398956 | 1.461808 |
| 17:39:57 | 2.883655 | 1.842041 | 1.923741 |
| 17:40:02 | 2.883655 | 1.842041 | 1.923741 |
| 17:40:07 | 2.883655 | 1.842041 | 1.923741 |
| 17:40:12 | 2.883655 | 1.842041 | 1.923741 |
| 17:40:17 | 3.045591 | 2.285126 | 2.385673 |
| 17:40:22 | 3.169473 | 2.532023 | 2.642788 |
| 17:40:27 | 3.311848 | 2.825131 | 2.948106 |
| 17:40:32 | 4.005226 | 3.91768 | 4.093237 |
| 17:40:37 | 4.795621 | 5.409704 | 5.660438 |
| 17:40:42 | 5.642314 | 7.246366 | 7.594044 |
| 17:40:47 | 6.314124 | 8.991067 | 9.428243 |
| 17:40:52 | 7.005892 | 10.8725 | 11.40903 |
| 17:40:57 | 7.604519 | 12.65406 | 13.28215 |
| 17:41:02 | 8.360733 | 14.77504 | 15.52064 |
| 17:41:07 | 8.984795 | 16.69675 | 17.54216 |
| 17:41:12 | 9.425025 | 18.321 | 19.28753 |
| 17:41:17 | 9.425025 | 18.321 | 19.28753 |
| 17:41:22 | 9.425025 | 18.321 | 19.28753 |
| 17:41:27 | 9.425025 | 18.321 | 19.28753 |
| 17:41:32 | 9.425025 | 18.321 | 19.28753 |
| 17:41:37 | 9.425025 | 18.321 | 19.28753 |
| 17:41:42 | 9.425025 | 18.321 | 19.28753 |
| 17:41:47 | 9.425025 | 18.321 | 19.28753 |
| 17:41:52 | 9.425025 | 18.321 | 19.28753 |
| 17:41:57 | 9.425025 | 18.321 | 19.28753 |
| 17:42:02 | 9.425025 | 18.321 | 19.28753 |
| 17:42:07 | 9.636975 | 18.78188 | 19.82357 |
| 17:42:12 | 9.873652 | 19.32048 | 20.44855 |
| 17:42:17 | 10.05463 | 19.80203 | 21.00402 |
| 17:42:22 | 1.229573 | 20.57772 | 21.91576 |
| 17:42:27 | 0 | 21.01124 | 22.63353 |
| 17:42:32 | 0 | 21.01124 | 23.11853 |
| 17:42:37 | 0 | 21.01124 | 23.47905 |
| 17:42:42 | 0 | 21.01124 | 23.74852 |
| 17:42:47 | 0.133505 | 6.707879 | 8.076519 |
| 17:42:52 | 0.26701 | 0 | 0.240517 |
| 17:42:57 | 0.26701 | 0 | 0 |
| 17:43:02 | 0.26701 | 0 | 0 |
| 17:43:07 | 0.26701 | 0 | 0 |
| 17:43:12 | 0.400515 | 0.433527 | 0.503192 |
| 17:43:17 | 0.400515 | 0.433527 | 0.503192 |
| 17:43:22 | 0.400515 | 0.433527 | 0.503192 |
| 17:43:27 | 0.400515 | 0.433527 | 0.503192 |
| 17:43:32 | 0.672592 | 0.889483 | 1.033277 |
| 17:43:37 | 0.944537 | 1.453229 | 1.689988 |
| 17:43:42 | 1.147799 | 1.98361 | 2.306967 |
| 17:43:47 | 1.675974 | 3.135047 | 3.671586 |
| 17:43:52 | 2.147944 | 4.360076 | 5.122628 |
| 17:43:57 | 2.669315 | 5.80863 | 6.850084 |
| 17:44:02 | 3.293305 | 7.601378 | 9.009717 |
| 17:44:07 | 3.969636 | 9.666905 | 11.51525 |
| 17:44:12 | 4.436948 | 11.37509 | 13.55324 |
| 17:44:17 | 4.436948 | 11.37509 | 13.55324 |
| 17:44:22 | 4.436948 | 11.37509 | 13.55324 |
| 17:44:27 | 4.436948 | 11.37509 | 13.55324 |
| 17:44:32 | 4.436948 | 11.37509 | 13.55324 |
| 17:44:37 | 4.436948 | 11.37509 | 13.55324 |
| 17:44:42 | 4.436948 | 11.37509 | 13.55324 |
| 17:44:47 | 4.436948 | 11.37509 | 13.55324 |
| 17:44:52 | 4.709956 | 12.30876 | 14.65048 |
| 17:44:57 | 4.843462 | 12.74228 | 15.15368 |
| 17:45:02 | 4.843462 | 12.74228 | 15.15368 |
| 17:45:07 | 5.012897 | 13.20051 | 15.69332 |
| 17:45:12 | 5.162375 | 13.63164 | 16.19374 |
| 17:45:17 | 5.304055 | 14.06334 | 16.69483 |
| 17:45:22 | 5.441747 | 14.49549 | 17.19643 |
| 17:45:27 | 0 | 14.92797 | 17.69962 |
| 17:45:32 | 0 | 15.36071 | 18.20281 |
| 17:45:37 | 0 | 15.65989 | 18.20281 |
| 17:45:42 | 0 | 16.01522 | 18.70601 |
| 17:45:47 | 0 | 16.25697 | 5.55526 |
| 17:45:52 | 0 | 4.330744 | 0 |
| 17:45:57 | 0.273009 | 0 | 0 |
| 17:46:02 | 0.406514 | 0 | 0 |
| 17:46:07 | 0.406514 | 0 | 0 |
| 17:46:12 | 0.406514 | 0 | 0 |
| 17:46:17 | 0.406514 | 0 | 0 |
| 17:46:22 | 0.406514 | 0 | 0 |
| 17:46:27 | 0.506373 | 0.089757 | 0.107919 |
| 17:46:32 | 1.075081 | 0.648387 | 0.790803 |
| 17:46:37 | 2.300406 | 1.99875 | 2.48955 |
| 17:46:42 | 3.215127 | 3.33583 | 4.165481 |
| 17:46:47 | 3.990232 | 4.675426 | 5.844712 |
| 17:46:52 | 5.077012 | 6.462968 | 8.131061 |
| 17:46:57 | 6.051387 | 8.268138 | 10.43186 |
| 17:47:02 | 7.110418 | 10.2756 | 13.01546 |
| 17:47:07 | 7.943916 | 12.0784 | 15.30303 |
| 17:47:12 | 8.80552 | 13.93374 | 17.67228 |
| 17:47:17 | 8.80552 | 13.93374 | 17.67228 |
| 17:47:22 | 8.80552 | 13.93374 | 17.67228 |
| 17:47:27 | 8.80552 | 13.93374 | 17.67228 |
| 17:47:32 | 8.80552 | 13.93374 | 17.67228 |
| 17:47:37 | 8.80552 | 13.93374 | 17.67228 |
| 17:47:42 | 9.003513 | 14.32503 | 18.14737 |
| 17:47:47 | 9.003513 | 14.32503 | 18.14737 |
| 17:47:52 | 9.003513 | 14.32503 | 18.14737 |
| 17:47:57 | 9.201507 | 14.71632 | 18.62245 |
| 17:48:02 | 9.201507 | 14.71632 | 18.62245 |
| 17:48:07 | 9.399501 | 15.10761 | 19.09754 |
| 17:48:12 | 9.669239 | 15.51274 | 19.60267 |
| 17:48:17 | 9.896646 | 15.89157 | 20.06285 |
| 17:48:22 | 10.10967 | 16.27342 | 20.52663 |
| 17:48:27 | 10.30766 | 16.66471 | 20.99316 |
| 17:48:32 | 1.356088 | 17.056 | 21.46175 |
| 17:48:37 | 0 | 17.44729 | 21.93192 |
| 17:48:42 | 0 | 4.925903 | 7.168218 |
| 17:48:47 | 0.197994 | 0 | 0 |
| 17:48:52 | 0.197994 | 0 | 0 |
| 17:48:57 | 0.395988 | 0 | 0 |
| 17:49:02 | 0.593982 | 0 | 0 |
| 17:49:07 | 0.593982 | 0 | 0 |
| 17:49:12 | 0.593982 | 0 | 0 |
| 17:49:17 | 0.791976 | 0.391292 | 0.475086 |
| 17:49:22 | 0.791976 | 0.391292 | 0.475086 |
| 17:49:27 | 0.918328 | 0.534147 | 0.647171 |
| 17:49:32 | 1.503772 | 1.140415 | 1.38971 |
| 17:49:37 | 2.474506 | 2.272254 | 2.801843 |
| 17:49:42 | 3.271395 | 3.447991 | 4.267963 |
| 17:49:47 | 3.988281 | 4.66478 | 5.787432 |
| 17:49:52 | 4.786075 | 6.051455 | 7.531763 |
| 17:49:57 | 5.499791 | 7.42082 | 9.249836 |
| 17:50:02 | 6.057178 | 8.643577 | 10.77239 |
| 17:50:07 | 6.656967 | 9.907453 | 12.35356 |
| 17:50:12 | 7.274126 | 11.19155 | 13.96102 |
| 17:50:17 | 7.274126 | 11.19155 | 13.96102 |
| 17:50:22 | 7.274126 | 11.19155 | 13.96102 |
| 17:50:27 | 7.274126 | 11.19155 | 13.96102 |
| 17:50:32 | 7.274126 | 11.19155 | 13.96102 |
| 17:50:37 | 7.274126 | 11.19155 | 13.96102 |
| 17:50:42 | 7.274126 | 11.19155 | 13.96102 |
| 17:50:47 | 7.274126 | 11.19155 | 13.96102 |
| 17:50:52 | 7.472119 | 11.58284 | 14.43611 |
| 17:50:57 | 7.881445 | 12.41929 | 15.46687 |
| 17:51:02 | 8.210313 | 12.90046 | 16.05964 |
| 17:51:07 | 8.468818 | 13.34265 | 16.59635 |
| 17:51:12 | 8.684439 | 13.78485 | 17.11303 |
| 17:51:17 | 8.787928 | 14.09515 | 17.47024 |
| 17:51:22 | 8.930247 | 14.45504 | 17.87914 |
| 17:51:27 | 0.66738 | 14.88978 | 18.33767 |
| 17:51:32 | 0 | 14.88978 | 18.33767 |
| 17:51:37 | 0 | 14.88978 | 18.33767 |
| 17:51:42 | 0 | 3.647149 | 5.37109 |
| 17:51:47 | 0 | 0 | 0 |
| 17:51:52 | 0 | 0 | 0 |
| 17:51:57 | 0 | 0 | 0 |
| 17:52:02 | 0 | 0 | 0 |
| 17:52:07 | 0 | 0 | 0 |
| 17:52:12 | 0.17271 | 0 | 0 |
| 17:52:17 | 0.17271 | 0 | 0 |
| 17:52:22 | 0.17271 | 0 | 0 |
| 17:52:27 | 0.352838 | 0.201935 | 0.212587 |
| 17:52:32 | 0.708112 | 0.679027 | 0.716061 |
| 17:52:37 | 1.352827 | 1.638281 | 1.732763 |
| 17:52:42 | 2.374831 | 3.329741 | 3.53754 |
| 17:52:47 | 3.15098 | 4.958883 | 5.273086 |
| 17:52:52 | 3.918982 | 6.731512 | 7.164607 |
| 17:52:57 | 4.473937 | 8.261073 | 8.791473 |
| 17:53:02 | 4.929929 | 9.636677 | 10.25271 |
| 17:53:07 | 5.639622 | 11.41131 | 12.14914 |
| 17:53:12 | 6.262524 | 13.0841 | 13.9314 |
| 17:53:17 | 6.262524 | 13.0841 | 13.9314 |
| 17:53:22 | 6.262524 | 13.0841 | 13.9314 |
| 17:53:27 | 6.262524 | 13.0841 | 13.9314 |
| 17:53:32 | 6.262524 | 13.0841 | 13.9314 |
| 17:53:37 | 6.262524 | 13.0841 | 13.9314 |
| 17:53:42 | 6.262524 | 13.0841 | 13.9314 |
| 17:53:47 | 6.262524 | 13.0841 | 13.9314 |
| 17:53:52 | 6.435234 | 13.51884 | 14.38992 |
| 17:53:57 | 6.435234 | 13.51884 | 14.38992 |
| 17:54:02 | 6.607944 | 13.95358 | 14.84844 |
| 17:54:07 | 6.932864 | 14.52542 | 15.45702 |
| 17:54:12 | 7.268163 | 15.15727 | 16.12631 |
| 17:54:17 | 7.518463 | 15.71489 | 16.71425 |
| 17:54:22 | 8.021346 | 16.69996 | 17.76513 |
| 17:54:27 | 8.34314 | 17.45356 | 18.5597 |
| 17:54:32 | 0.373827 | 4.929039 | 5.482106 |
| 17:54:37 | 0 | 0 | 0 |
| 17:54:42 | 0 | 0 | 0 |
| 17:54:47 | 0 | 0 | 0 |
| 17:54:52 | 0.17271 | 0 | 0 |
| 17:54:57 | 0.34542 | 0 | 0 |
| 17:55:02 | 0.34542 | 0 | 0 |
| 17:55:07 | 0.34542 | 0 | 0 |
| 17:55:12 | 0.34542 | 0 | 0 |
| 17:55:17 | 0.518129 | 0.434742 | 0.458521 |
| 17:55:22 | 0.518129 | 0.434742 | 0.458521 |
| 17:55:27 | 0.625787 | 0.59281 | 0.624864 |
| 17:55:32 | 1.129994 | 1.269438 | 1.340273 |
| 17:55:37 | 1.753929 | 2.263124 | 2.393655 |
| 17:55:42 | 2.654154 | 3.826671 | 4.059931 |
| 17:55:47 | 3.588673 | 5.70119 | 6.062468 |
| 17:55:52 | 4.324478 | 7.468868 | 7.947502 |
| 17:55:57 | 5.072666 | 9.353794 | 9.960797 |
| 17:56:02 | 5.517636 | 10.78545 | 11.48027 |
| 17:56:07 | 5.826807 | 11.9468 | 12.71006 |
| 17:56:12 | 6.08632 | 12.9149 | 13.7254 |
| 17:56:17 | 6.08632 | 12.9149 | 13.7254 |
| 17:56:22 | 6.08632 | 12.9149 | 13.7254 |
| 17:56:27 | 6.08632 | 12.9149 | 13.7254 |
| 17:56:32 | 6.08632 | 12.9149 | 13.7254 |
| 17:56:37 | 6.08632 | 12.9149 | 13.7254 |
| 17:56:42 | 6.293226 | 13.34395 | 14.15263 |
| 17:56:47 | 6.721627 | 14.26722 | 15.07169 |
| 17:56:52 | 6.721627 | 14.26722 | 15.07169 |
| 17:56:57 | 6.721627 | 14.26722 | 15.07169 |
| 17:57:02 | 6.721627 | 14.26722 | 15.07169 |
| 17:57:07 | 6.842371 | 14.51346 | 15.31972 |
| 17:57:12 | 7.114515 | 14.93147 | 15.73959 |
| 17:57:17 | 7.349525 | 15.33116 | 16.13896 |
| 17:57:22 | 7.799376 | 16.0136 | 16.8226 |

Table S6. Raw data of Figure 10 (IQA trajectories)

| Lane 1 | | | | Lane 2 | | | | Lane 3 | | | |
| --- | --- | --- | --- | --- | --- | --- | --- | --- | --- | --- | --- |
| Time | upstream turning flow | IQA  (veh/5 s) | Volume  (veh/5 s) | Time | upstream turning flow | IQA (veh/5 s) | Volume  (veh/5 s) | Time | upstream turning flow | IQA (veh/5 s) | Volume  (veh/5 s) |
| 17:40:02 | T and R | 0.624 | 3 | 17:40:02 | T and R | 1.922 | 3 | 17:40:02 | T and R | 2.022 | 3 |
| 17:40:07 | T and R | 0.440 | 2 | 17:40:07 | T and R | 1.624 | 2 | 17:40:07 | T and R | 1.745 | 2 |
| 17:40:12 | R | 0.000 | 0 | 17:40:12 | R | 0.000 | 0 | 17:40:12 | R | 0.000 | 0 |
| 17:40:17 | R | 0.000 | 0 | 17:40:17 | R | 0.000 | 0 | 17:40:17 | R | 0.000 | 0 |
| 17:40:22 | R | 0.000 | 0 | 17:40:22 | R | 0.000 | 0 | 17:40:22 | R | 0.000 | 0 |
| 17:40:27 | R | 0.000 | 0 | 17:40:27 | R | 0.000 | 0 | 17:40:27 | R | 0.000 | 0 |
| 17:40:32 | R | 0.000 | 0 | 17:40:32 | R | 0.000 | 0 | 17:40:32 | R | 0.000 | 0 |
| 17:40:37 | R | 0.000 | 0 | 17:40:37 | R | 0.000 | 0 | 17:40:37 | R | 0.000 | 0 |
| 17:40:42 | R | 0.000 | 0 | 17:40:42 | R | 0.000 | 0 | 17:40:42 | R | 0.000 | 0 |
| 17:40:47 | R | 0.000 | 0 | 17:40:47 | R | 0.000 | 0 | 17:40:47 | R | 0.000 | 0 |
| 17:40:52 | R | 0.000 | 0 | 17:40:52 | R | 0.000 | 0 | 17:40:52 | R | 0.000 | 0 |
| 17:40:57 | R | 0.000 | 0 | 17:40:57 | R | 0.000 | 0 | 17:40:57 | R | 0.000 | 0 |
| 17:41:02 | L and R | 0.212 | 3 | 17:41:02 | L and R | 0.461 | 3 | 17:41:02 | L and R | 0.536 | 3 |
| 17:41:07 | L and R | 0.237 | 2 | 17:41:07 | L and R | 0.539 | 2 | 17:41:07 | L and R | 0.625 | 2 |
| 17:41:12 | L and R | 0.181 | 1 | 17:41:12 | L and R | 0.482 | 1 | 17:41:12 | L and R | 0.555 | 1 |
| 17:41:17 | R | 0.000 | 0 | 17:41:17 | L and R | 0.776 | 3 | 17:41:17 | L and R | 0.912 | 3 |
| 17:41:22 | R | 0.134 | 1 | 17:41:22 | R | 0.434 | 1 | 17:41:22 | R | 0.503 | 1 |
| 17:41:27 | R | 0.134 | 1 | 17:41:27 | R | 0.000 | 0 | 17:41:27 | R | 0.000 | 0 |
| 17:41:32 | R | 0.000 | 0 | 17:41:32 | R | 0.000 | 0 | 17:41:32 | R | 0.000 | 0 |
| 17:41:37 | R | 0.000 | 0 | 17:41:37 | R | 0.000 | 0 | 17:41:37 | R | 0.000 | 0 |
| 17:41:42 | R | 0.000 | 0 | 17:41:42 | R | 0.434 | 1 | 17:41:42 | R | 0.503 | 1 |
| 17:41:47 | R | 0.134 | 1 | 17:41:47 | R | 0.000 | 0 | 17:41:47 | R | 0.000 | 0 |
| 17:42:12 | R | 0.000 | 0 | 17:42:17 | R | 0.000 | 0 | 17:41:52 | R | 0.000 | 0 |
| 17:42:17 | R | 0.000 | 0 | 17:42:22 | R | 0.000 | 0 | 17:41:57 | R | 0.000 | 0 |
| 17:42:22 | R | 0.000 | 0 | 17:42:27 | T and R | 0.456 | 4 | 17:42:02 | T and R | 0.530 | 4 |
| 17:42:27 | T and R | 0.272 | 4 | 17:42:32 | T and R | 0.564 | 2 | 17:42:07 | T and R | 0.657 | 2 |
| 17:42:32 | T and R | 0.272 | 2 | 17:42:37 | T and R | 0.530 | 1 | 17:42:12 | T and R | 0.617 | 1 |
| 17:42:37 | T and R | 0.203 | 1 | 17:42:42 | T and R | 1.151 | 6 | 17:42:17 | T and R | 1.365 | 6 |
| 17:42:42 | T and R | 0.528 | 6 | 17:42:47 | T and R | 1.225 | 3 | 17:42:22 | T and R | 1.451 | 3 |
| 17:42:47 | T and R | 0.472 | 3 | 17:42:52 | T and R | 1.449 | 4 | 17:42:27 | T and R | 1.727 | 4 |
| 17:42:52 | T and R | 0.521 | 4 | 17:42:57 | T and R | 1.793 | 5 | 17:42:32 | T and R | 2.160 | 5 |
| 17:42:57 | T and R | 0.624 | 5 | 17:43:02 | T and R | 2.066 | 5 | 17:42:37 | T and R | 2.506 | 5 |
| 17:43:02 | T and R | 0.676 | 5 | 17:43:07 | T and R | 1.708 | 2 | 17:42:42 | T and R | 2.038 | 2 |
| 17:43:07 | T and R | 0.467 | 2 | 17:43:12 | R | 0.000 | 0 | 17:42:47 | R | 0.000 | 0 |
| 17:43:12 | R | 0.000 | 0 | 17:43:17 | R | 0.000 | 0 | 17:42:52 | R | 0.000 | 0 |
| 17:43:17 | R | 0.000 | 0 | 17:43:22 | R | 0.000 | 0 | 17:42:57 | R | 0.000 | 0 |
| 17:43:22 | R | 0.000 | 0 | 17:43:27 | R | 0.000 | 0 | 17:43:02 | R | 0.000 | 0 |
| 17:43:27 | R | 0.000 | 0 | 17:43:32 | R | 0.000 | 0 | 17:43:07 | R | 0.000 | 0 |
| 17:43:32 | R | 0.000 | 0 | 17:43:37 | R | 0.000 | 0 | 17:43:12 | R | 0.000 | 0 |
| 17:43:37 | R | 0.000 | 0 | 17:43:42 | R | 0.000 | 0 | 17:43:17 | R | 0.000 | 0 |
| 17:43:42 | R | 0.000 | 0 | 17:43:47 | R | 0.934 | 2 | 17:43:22 | R | 1.097 | 2 |
| 17:43:47 | R | 0.273 | 2 | 17:43:52 | R | 0.434 | 1 | 17:43:27 | R | 0.503 | 1 |
| 17:43:52 | R | 0.134 | 1 | 17:43:57 | R | 0.000 | 0 | 17:43:32 | R | 0.000 | 0 |
| 17:43:57 | R | 0.000 | 0 | 17:44:02 | L and R | 0.458 | 2 | 17:43:37 | L and R | 0.540 | 2 |
| 17:44:02 | L and R | 0.169 | 2 | 17:44:07 | L and R | 0.431 | 1 | 17:44:07 | L and R | 0.500 | 1 |
| 17:44:07 | L and R | 0.149 | 1 | 17:44:12 | L and R | 0.432 | 1 | 17:44:12 | L and R | 0.501 | 1 |
| 17:44:12 | L and R | 0.142 | 1 | 17:44:17 | L and R | 0.432 | 1 | 17:44:17 | L and R | 0.502 | 1 |
| 17:44:17 | L and R | 0.138 | 1 | 17:44:22 | R | 0.432 | 1 | 17:44:22 | R | 0.503 | 1 |
| 17:44:22 | R | 0.000 | 0 | 17:44:27 | R | 0.433 | 1 | 17:44:27 | R | 0.503 | 1 |
| 17:44:27 | R | 0.000 | 0 | 17:44:32 | R | 0.299 | 0 | 17:44:32 | R | 0.000 | 0 |
| 17:44:32 | R | 0.273 | 2 | 17:44:37 | R | 0.355 | 1 | 17:44:37 | R | 0.503 | 1 |
| 17:44:37 | R | 0.134 | 1 | 17:44:42 | R | 0.242 | 0 | 17:44:42 | R | 0.000 | 0 |
| 17:44:42 | R | 0.000 | 0 | 17:44:47 | R | 0.000 | 0 | 17:44:47 | R | 0.000 | 0 |
| 17:44:47 | R | 0.000 | 0 | 17:44:52 | R | 0.000 | 0 | 17:44:52 | T and R | 0.108 | 1 |
| 17:44:52 | R | 0.000 | 0 | 17:44:57 | T and R | 0.090 | 1 | 17:44:57 | T and R | 0.683 | 5 |
| 17:45:17 | R | 0.000 | 0 | 17:45:27 | T and R | 0.559 | 5 | 17:45:32 | T and R | 1.699 | 8 |
| 17:45:22 | T and R | 0.100 | 1 | 17:45:32 | T and R | 1.350 | 8 | 17:45:37 | T and R | 1.676 | 3 |
| 17:45:27 | T and R | 0.569 | 5 | 17:45:37 | T and R | 1.337 | 3 | 17:45:42 | T and R | 1.679 | 3 |
| 17:45:32 | T and R | 1.225 | 8 | 17:45:42 | T and R | 1.340 | 3 | 17:45:47 | T and R | 2.286 | 6 |
| 17:45:37 | T and R | 0.915 | 3 | 17:45:47 | T and R | 1.788 | 6 | 17:45:52 | T and R | 2.301 | 4 |
| 17:45:42 | T and R | 0.775 | 3 | 17:45:52 | T and R | 1.805 | 4 | 17:45:57 | T and R | 2.584 | 5 |
| 17:45:47 | T and R | 1.087 | 6 | 17:45:57 | T and R | 2.007 | 5 | 17:46:02 | T and R | 2.288 | 3 |
| 17:45:52 | T and R | 0.974 | 4 | 17:46:02 | T and R | 1.803 | 3 | 17:46:07 | T and R | 2.369 | 4 |
| 17:45:57 | T and R | 1.059 | 5 | 17:46:07 | T and R | 1.855 | 4 | 17:46:12 | R | 0.000 | 0 |
| 17:46:02 | T and R | 0.833 | 3 | 17:46:12 | R | 0.000 | 0 | 17:46:17 | R | 0.000 | 0 |
| 17:46:07 | T and R | 0.862 | 4 | 17:46:17 | R | 0.000 | 0 | 17:46:22 | R | 0.000 | 0 |
| 17:46:12 | R | 0.000 | 0 | 17:46:22 | R | 0.000 | 0 | 17:46:27 | R | 0.000 | 0 |
| 17:46:17 | R | 0.000 | 0 | 17:46:27 | R | 0.000 | 0 | 17:46:32 | R | 0.000 | 0 |
| 17:46:22 | R | 0.000 | 0 | 17:46:32 | R | 0.000 | 0 | 17:46:37 | R | 0.475 | 1 |
| 17:46:27 | R | 0.000 | 0 | 17:46:37 | R | 0.391 | 1 | 17:46:42 | R | 0.000 | 0 |
| 17:46:32 | R | 0.000 | 0 | 17:46:42 | R | 0.000 | 0 | 17:46:47 | R | 0.000 | 0 |
| 17:46:37 | R | 0.198 | 1 | 17:46:47 | R | 0.000 | 0 | 17:46:52 | R | 0.475 | 1 |
| 17:46:42 | R | 0.000 | 0 | 17:46:52 | R | 0.391 | 1 | 17:46:57 | R | 0.000 | 0 |
| 17:46:47 | R | 0.000 | 0 | 17:46:57 | R | 0.000 | 0 | 17:47:02 | R | 0.475 | 1 |
| 17:46:52 | R | 0.198 | 1 | 17:47:02 | R | 0.391 | 1 | 17:47:07 | L and R | 0.505 | 2 |
| 17:46:57 | R | 0.000 | 0 | 17:47:07 | L and R | 0.405 | 2 | 17:47:12 | L and R | 0.460 | 1 |
| 17:47:02 | R | 0.198 | 1 | 17:47:12 | L and R | 0.379 | 1 | 17:47:17 | L and R | 0.464 | 1 |
| 17:47:07 | L and R | 0.270 | 2 | 17:47:17 | L and R | 0.382 | 1 | 17:47:22 | L and R | 0.467 | 1 |
| 17:47:12 | L and R | 0.227 | 1 | 17:47:22 | L and R | 0.391 | 1 | 17:47:27 | R | 0.469 | 1 |
| 17:47:17 | L and R | 0.213 | 1 | 17:47:27 | R | 0.391 | 1 | 17:47:32 | R | 0.470 | 1 |
| 17:47:22 | L and R | 0.198 | 1 | 17:47:32 | R | 0.391 | 1 | 17:47:37 | R | 0.475 | 1 |
| 17:47:27 | R | 0.198 | 1 | 17:47:37 | R | 0.391 | 1 | 17:47:42 | R | 0.000 | 0 |
| 17:47:32 | R | 0.000 | 0 | 17:47:42 | R | 0.000 | 0 | 17:47:47 | T and R | 0.172 | 1 |
| 17:47:37 | R | 0.198 | 1 | 17:47:47 | T and R | 0.143 | 1 | 17:47:52 | T and R | 0.743 | 5 |
| 17:47:42 | R | 0.198 | 1 | 17:47:52 | T and R | 0.606 | 5 | 17:47:57 | T and R | 1.412 | 6 |
| 17:47:47 | R | 0.000 | 0 | 17:47:57 | T and R | 1.132 | 6 | 17:48:02 | T and R | 1.466 | 3 |
| 17:47:52 | R | 0.000 | 0 | 17:48:02 | T and R | 1.176 | 3 | 17:48:07 | T and R | 1.519 | 3 |
| 17:47:57 | R | 0.198 | 1 | 17:48:07 | T and R | 1.217 | 3 | 17:48:12 | T and R | 1.744 | 4 |
| 17:48:17 | R | 0.000 | 0 | 17:48:47 | T and R | 1.387 | 4 | 17:48:52 | T and R | 1.718 | 3 |
| 17:48:22 | T and R | 0.126 | 1 | 17:48:52 | T and R | 1.369 | 3 | 17:48:57 | T and R | 1.523 | 2 |
| 17:48:27 | T and R | 0.585 | 5 | 17:48:57 | T and R | 1.223 | 2 | 17:49:02 | T and R | 1.581 | 3 |
| 17:48:32 | T and R | 0.971 | 6 | 17:49:02 | T and R | 1.264 | 3 | 17:49:07 | T and R | 1.607 | 3 |
| 17:48:37 | T and R | 0.797 | 3 | 17:49:07 | T and R | 1.284 | 3 | 17:49:12 | R | 0.000 | 0 |
| 17:48:42 | T and R | 0.717 | 3 | 17:49:12 | R | 0.000 | 0 | 17:49:17 | R | 0.000 | 0 |
| 17:48:47 | T and R | 0.798 | 4 | 17:49:17 | R | 0.000 | 0 | 17:49:22 | R | 0.000 | 0 |
| 17:48:52 | T and R | 0.714 | 3 | 17:49:22 | R | 0.000 | 0 | 17:49:27 | R | 0.000 | 0 |
| 17:48:57 | T and R | 0.557 | 2 | 17:49:27 | R | 0.000 | 0 | 17:49:32 | R | 0.000 | 0 |
| 17:49:02 | T and R | 0.600 | 3 | 17:49:32 | R | 0.000 | 0 | 17:49:37 | R | 0.000 | 0 |
| 17:49:07 | T and R | 0.617 | 3 | 17:49:37 | R | 0.000 | 0 | 17:49:42 | R | 0.000 | 0 |
| 17:49:12 | R | 0.000 | 0 | 17:49:42 | R | 0.000 | 0 | 17:49:47 | R | 0.475 | 1 |
| 17:49:17 | R | 0.000 | 0 | 17:49:47 | R | 0.391 | 1 | 17:49:52 | R | 1.031 | 2 |
| 17:49:22 | R | 0.000 | 0 | 17:49:52 | R | 0.836 | 2 | 17:49:57 | L and R | 0.593 | 2 |
| 17:49:27 | R | 0.000 | 0 | 17:49:57 | L and R | 0.481 | 2 | 17:50:02 | L and R | 0.537 | 1 |
| 17:49:32 | R | 0.000 | 0 | 17:50:02 | L and R | 0.442 | 1 | 17:50:07 | L and R | 0.517 | 1 |
| 17:49:37 | R | 0.000 | 0 | 17:50:07 | L and R | 0.442 | 1 | 17:50:12 | L and R | 0.357 | 0 |
| 17:49:42 | R | 0.000 | 0 | 17:50:12 | L and R | 0.310 | 0 |  |  |  |  |
| 17:49:47 | R | 0.198 | 1 |  |  |  |  |  |  |  |  |
| 17:49:52 | R | 0.409 | 2 |  |  |  |  |  |  |  |  |
| 17:49:57 | L and R | 0.329 | 2 |  |  |  |  |  |  |  |  |
| 17:50:02 | L and R | 0.259 | 1 |  |  |  |  |  |  |  |  |
| 17:50:07 | L and R | 0.216 | 1 |  |  |  |  |  |  |  |  |
| 17:50:12 | L and R | 0.103 | 0 |  |  |  |  |  |  |  |  |
